# Supplementary material for: Spontaneous chromosomal instability in peripheral blood lymphocytes from two molecularly confirmed Italian patients with Hereditary Fibrosis Poikiloderma: insights into cancer predisposition
Source: PubMed Central journal article supplement (PMC8345126; doi:10.1590/1678-4685-gmb-2020-0332), 2021-08-06
Supplement: 1415-4757-GMB-44-3-e20200332-s2.pdf [file 1415-4757-GMB-44-3-e20200332-s2.pdf]

**Supplementary Material to “Spontaneous chromosomal instability in peripheral blood lymphocytes from two molecularly confirmed Italian patients with Hereditary Fibrosis Poikiloderma: insights into cancer predisposition”**

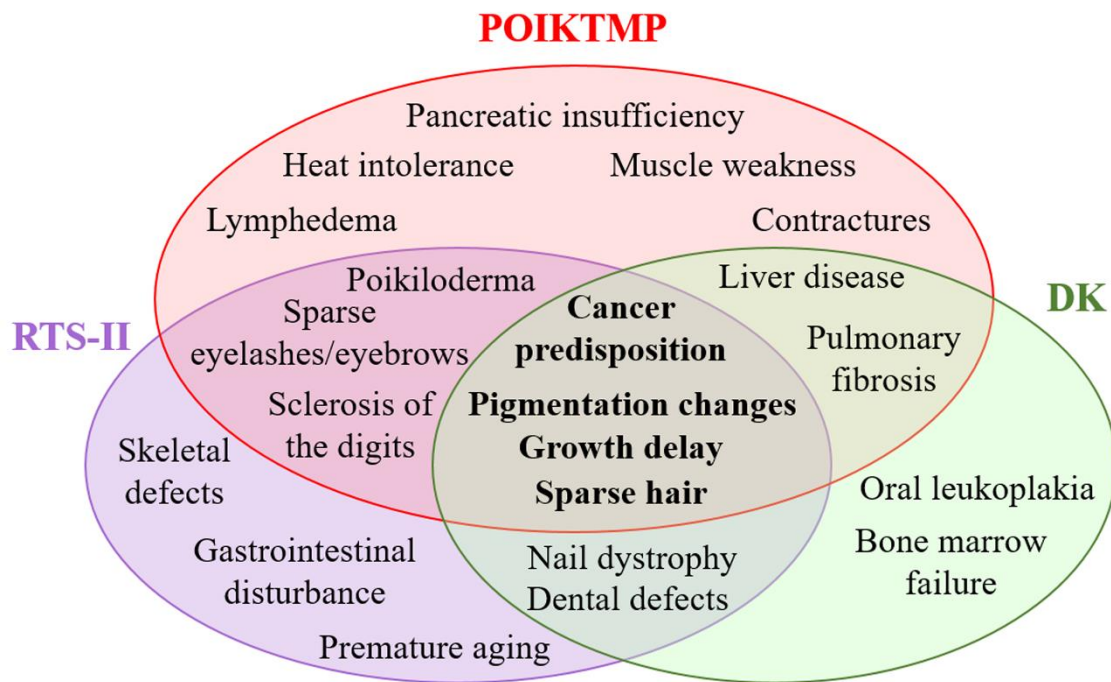

**Figure S1** - Common and specific clinical features of POIKTMP, RTS-II, and DK.

Diagram illustrating the main clinical signs (black-boldd characters) shared by patients with the three syndromes having POIKTMP as reference. Distinctive features of each disorder are indicated in red for POIKTMP, violet for RTS-II, and green for DK.
